# Supplementary material
Source: MDPI journal article supplement (https://www.mdpi.com/2077-1312/11/2/381)
Supplement: s1 [file s1]

---

## Supplementary Material

### Application of the Gini Index on the Evaluation of the Environmental Heterogeneity and Habitat Suitability Index for Larval Gobies

Lu Zhai<sup>1,2</sup>, Rong Wan<sup>1,2\*</sup>, Siquan Tian<sup>1,2</sup>, Zengguang Li<sup>1,2</sup>, Pengbo Song<sup>2</sup>, Jun Lin<sup>1</sup>

<sup>1</sup> College of Marine Sciences, Shanghai Ocean University, Shanghai 201306, China,

<sup>2</sup> National Engineering Research Center for Oceanic Fisheries, Shanghai Ocean University,

Shanghai 201306, China

<sup>3</sup> Fisheries College, Ocean University of China, Qingdao 266003, China,

\* Correspondence: rongwan@shou.edu.cn

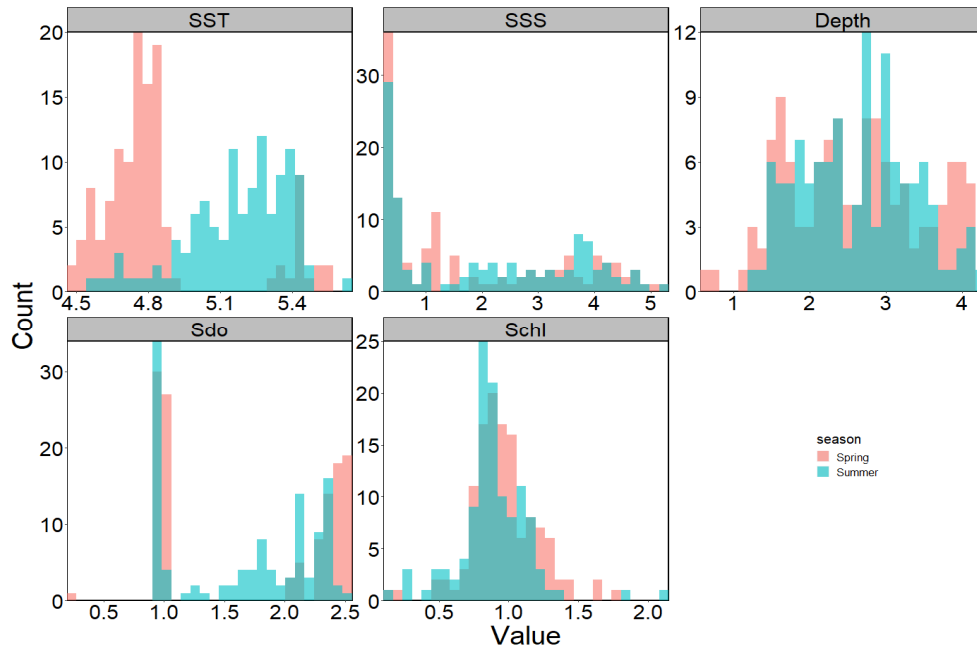

Figure S1. Histogram of environmental factors in the spring and summer in the Yangtze Estuary (2018–2020).

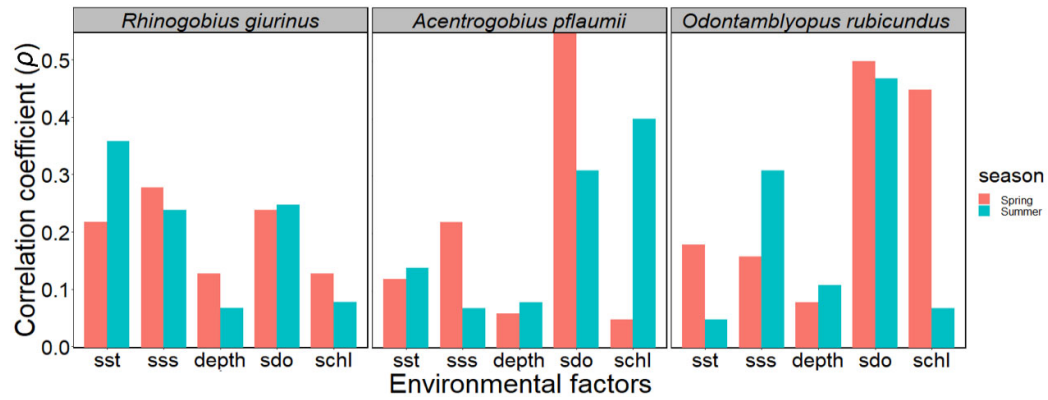

Figure S2. The correlation coefficient ( $\rho$ ) of gobies and each environmental factor in the spring and summer in the Yangtze Estuary (2018–2020).

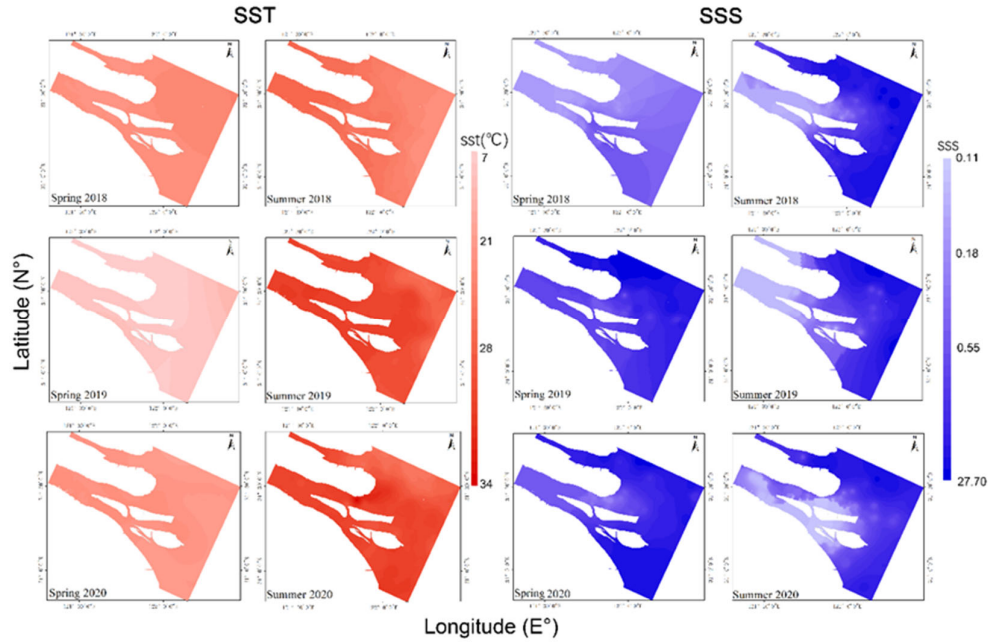

Figure S3. The spatial distribution of the sea temperature and salinity in the spring and summer in the Yangtze Estuary (2018-2020).

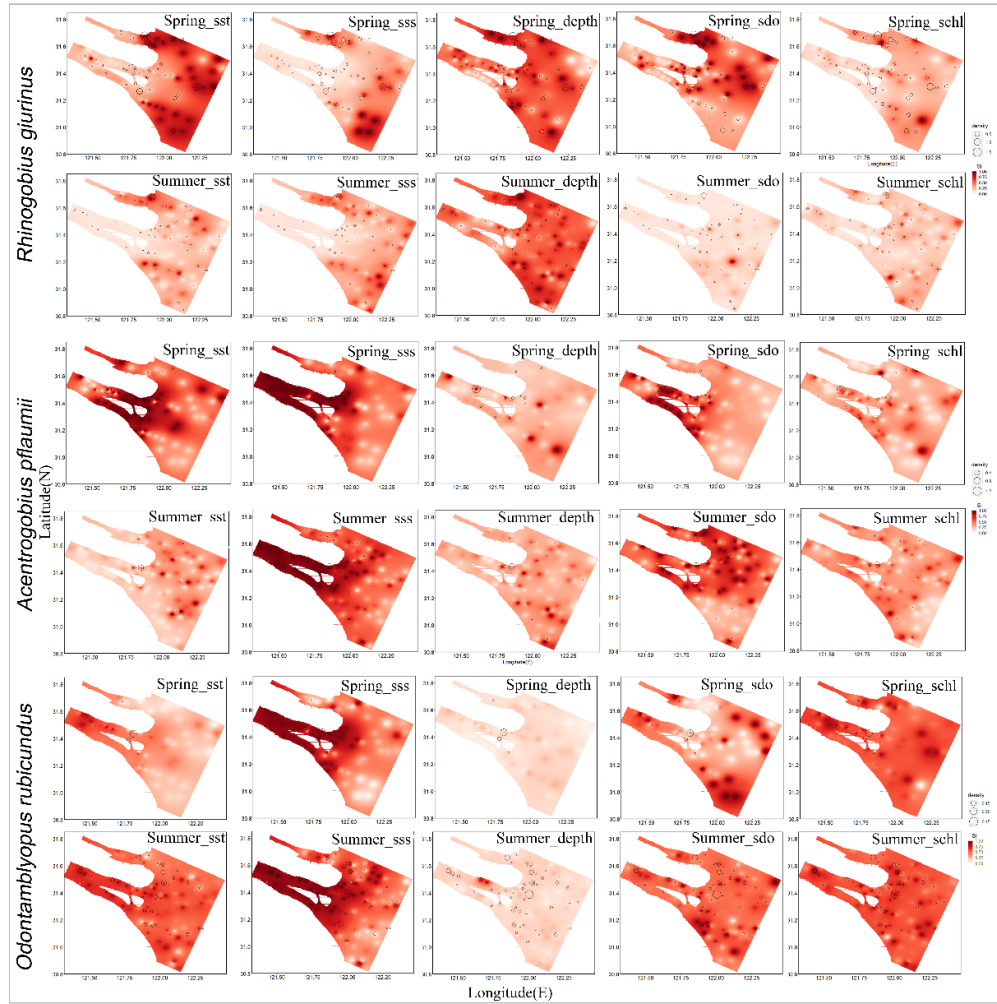

Figure S4. The spatial distribution of SI of environmental factors for three larval gobies in the Yangtze Estuary.

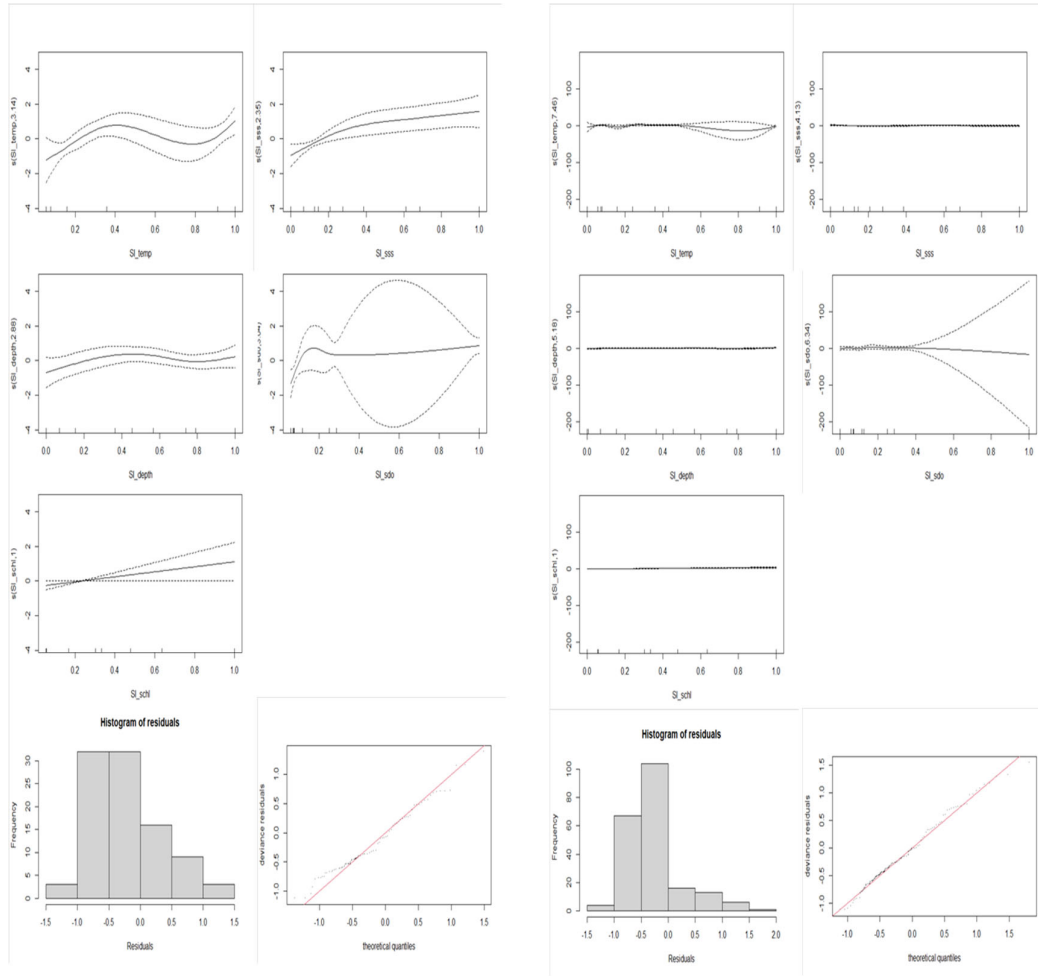

Figure S5. Results for *Rhinogobius giurinus* derived by GAM (left two panels: spring; right two panels: summer)

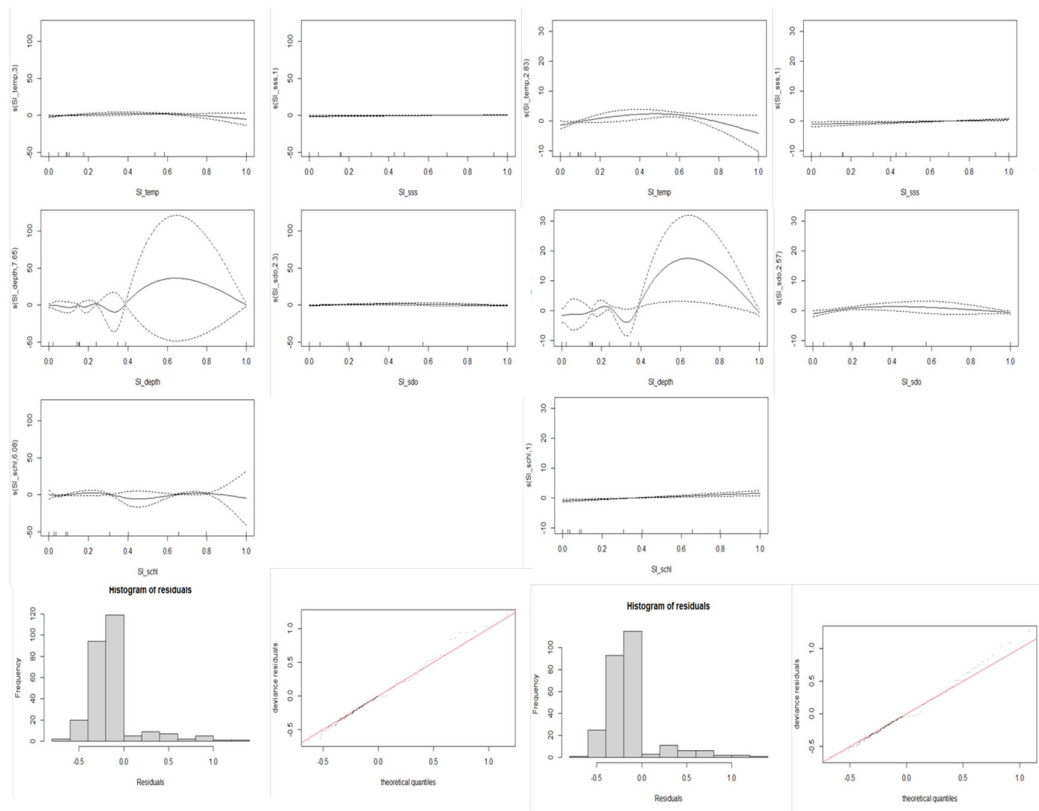

Figure S6. Results for *Acentrogobius pflaumii* derived by GAM (left two panels: spring; right two panels: summer)

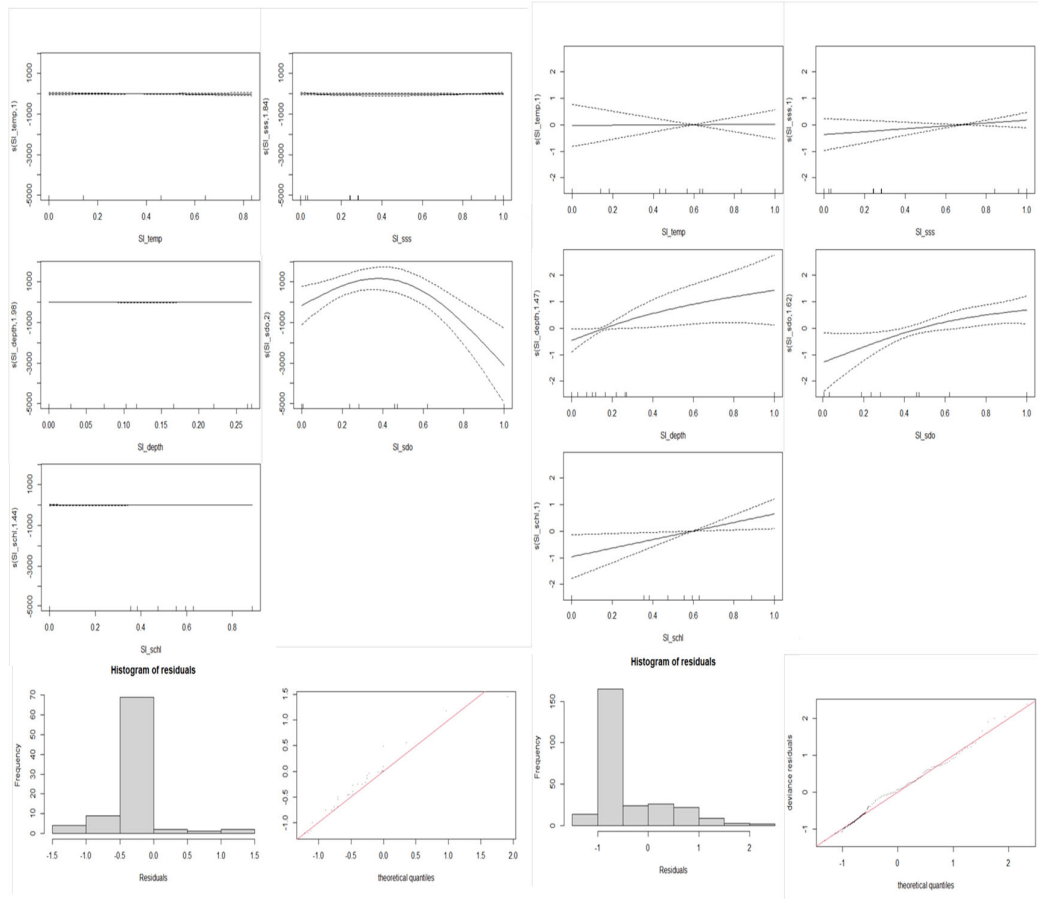

Figure S7. Results for *Odontamblyopus rubicundus* derived by GAM (left two panels: spring; right two panels: summer)

Table S1. Summary of environmental factors in the spring and summer in the Yangtze Estuary (2018–2020).

| Season | Factors | SST   | SSS   | Dep   | Sdo  | Schl |
|--------|---------|-------|-------|-------|------|------|
| Spring | Min     | 20.00 | 0.14  | 0.43  | 0.06 | 0.03 |
|        | Max     | 30.91 | 26.68 | 17.37 | 6.41 | 3.18 |
|        | Mean    | 23.42 | 5.78  | 7.56  | 3.50 | 0.98 |
| Summer | Min     | 20.77 | 0.13  | 1.66  | 0.90 | 0.02 |
|        | Max     | 31.60 | 27.68 | 18.27 | 6.15 | 4.56 |
|        | Mean    | 26.79 | 6.58  | 7.48  | 3.17 | 0.86 |
